# Supplementary material for: Bixin Attenuates High‐Fat Diet‐Caused Liver Steatosis and Inflammatory Injury through Nrf2/PPARα Signals
Source: Hindawi journal article supplement (doi:10.1155/2021/6610124), 2021-01-01

S1

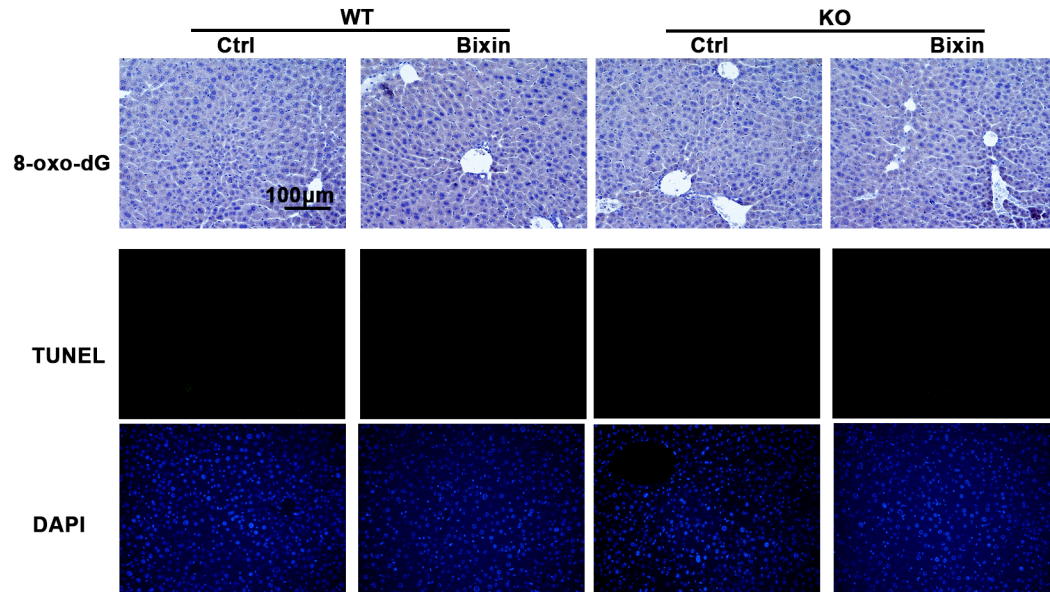

Supplement: f1 [file 6610124.f1.pdf]
